# Supplementary material
Source: PubMed Central journal article supplement (PMC3060560)

**Figure S1**

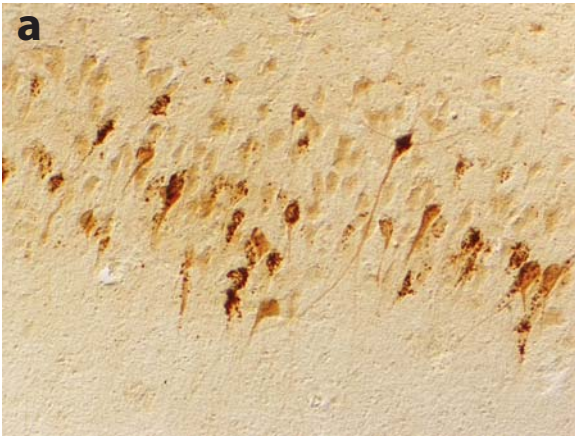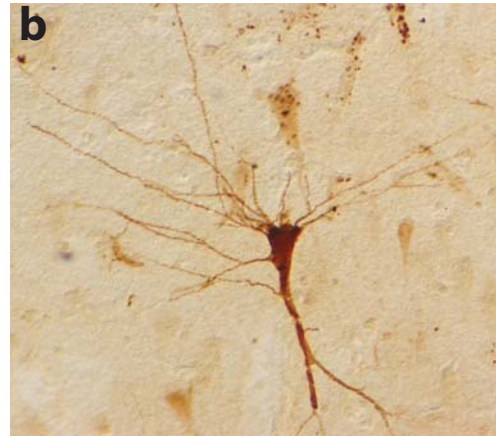

Supplement: NIHMS273975-supplement-supp_Fig_1.pdf [file NIHMS273975-supplement-supp_Fig_1.pdf]
